# Supplementary material
Source: PubMed Central journal article supplement (PMC5710291)
Supplement: jamaotolaryngolheadnecksurg-143-920-s001.pdf [file jamaotolaryngolheadnecksurg-143-920-s001.pdf]

## Supplementary Online Content

Su BM, Chan DK. Prevalence of hearing loss in US children and adolescents: findings from NHANES 1988-2010. *JAMA Otolaryngol–Head Neck Surg*. Published online: July 27, 2017. doi:10.1001/jamaoto.2017.0953

**eTable.** Significant odds ratios from multivariate regression models

This supplementary material has been provided by the authors to give readers additional information about their work.

eTable. Significant odds ratios from multivariate regression models

| <b>NHANES III</b>                           |                   |           |                   |               |       |          |
|---------------------------------------------|-------------------|-----------|-------------------|---------------|-------|----------|
|                                             |                   |           | <b>Odds Ratio</b> | <b>95% CI</b> |       | <b>p</b> |
| <b>Hearing Loss <math>\geq</math> 20 dB</b> | 3+ ear infections | Yes       | 3.157             | 1.608         | 6.198 | 0.0013   |
| <b>Hearing Loss <math>\geq</math> 15 dB</b> | Sex               | Male      | 1.422             | 1.002         | 2.019 | 0.0491   |
|                                             | 3+ ear infections | Yes       | 1.6               | 1.088         | 2.354 | 0.018    |
| <b>LFHL</b>                                 | 3+ ear infections | Yes       | 2.272             | 1.402         | 3.681 | 0.0013   |
| <b>HFHL</b>                                 | Sex               | Male      | 1.615             | 1.139         | 2.29  | 0.0082   |
|                                             | PIR category      | 1.4 - 3.5 | 0.757             | 0.494         | 1.162 | 0.1977   |
|                                             |                   | > 3.5     | 0.563             | 0.323         | 0.979 | 0.0421   |
|                                             | 3+ ear infections | Yes       | 1.501             | 1.012         | 2.226 | 0.0436   |
| <b>NITS</b>                                 | Age               | 14-15     | 0.776             | 0.462         | 1.304 | 0.3312   |
|                                             |                   | 16-17     | 0.985             | 0.616         | 1.573 | 0.9477   |
|                                             |                   | 18-19     | 1.818             | 1.104         | 2.993 | 0.0198   |
|                                             | Sex               | Male      | 1.764             | 1.294         | 2.404 | 0.0006   |
| <b>NHANES 2005-2006</b>                     |                   |           |                   |               |       |          |
|                                             |                   |           | <b>Odds Ratio</b> | <b>95% CI</b> |       | <b>p</b> |
| <b>Hearing Loss <math>\geq</math> 20 dB</b> | Age               | 14-15     | 1.938             | 0.602         | 6.239 | 0.2462   |
|                                             |                   | 16-17     | 1.474             | 0.514         | 4.223 | 0.4446   |
|                                             |                   | 18-19     | 2.81              | 1.024         | 7.712 | 0.0454   |
|                                             | Sex               | Male      | 1.256             | 0.707         | 2.228 | 0.0454   |
| <b>Hearing Loss <math>\geq</math> 15 dB</b> | Sex               | Male      | 1.388             | 1.046         | 1.841 | 0.0259   |
| <b>HFHL</b>                                 | Sex               | Male      | 1.593             | 1.17          | 2.17  | 0.0058   |
| <b>NITS</b>                                 | Age               | 14-15     | 1.332             | 0.642         | 2.765 | 0.4153   |
|                                             |                   | 16-17     | 2.218             | 1.252         | 3.93  | 0.0096   |
|                                             |                   | 18-19     | 0.908             | 0.457         | 1.802 | 0.7674   |
| <b>NHANES 2007-2008</b>                     |                   |           |                   |               |       |          |
|                                             |                   |           | <b>Odds Ratio</b> | <b>95% CI</b> |       | <b>p</b> |
| <b>LFHL</b>                                 | PIR category      | 1.4 - 3.5 | 0.759             | 0.444         | 1.298 | 0.2927   |
|                                             |                   | > 3.5     | 0.367             | 0.179         | 0.752 | 0.0092   |
| <b>NITS</b>                                 | Sex               | Male      | 0.53              | 0.34          | 0.827 | 0.0081   |
| <b>NHANES 2009-2010</b>                     |                   |           |                   |               |       |          |
|                                             |                   |           | <b>Odds Ratio</b> | <b>95% CI</b> |       | <b>p</b> |
| <b>Hearing Loss <math>\geq</math></b>       | 3+ ear infections | Yes       | 2.923             | 1.363         | 6.269 | 0.0088   |

|                                             |                   |                    |       |       |       |        |
|---------------------------------------------|-------------------|--------------------|-------|-------|-------|--------|
| <b>20 dB</b>                                |                   |                    |       |       |       |        |
|                                             | Firearm use       | Yes                | 2.191 | 1.109 | 4.332 | 0.0267 |
| <b>Hearing Loss <math>\geq</math> 15 dB</b> | Race/ Ethnicity   | Non-Hispanic white | 0.66  | 0.444 | 0.976 | 0.0389 |
|                                             | PIR category      | 1.4 - 3.5          | 0.929 | 0.582 | 1.482 | 0.7422 |
|                                             |                   | > 3.5              | 0.538 | 0.295 | 0.979 | 0.0434 |
|                                             | 3+ ear infections | Yes                | 2.159 | 1.463 | 3.185 | 0.0007 |
| <b>LFHL</b>                                 | Race/ Ethnicity   | Non-Hispanic white | 0.484 | 0.279 | 0.84  | 0.0131 |
|                                             | 3+ ear infections | Yes                | 2.902 | 1.623 | 5.188 | 0.0013 |
|                                             | Firearm use       | Yes                | 2.694 | 1.723 | 4.211 | 0.0002 |
| <b>HFHL</b>                                 | 3+ ear infections | Yes                | 2.039 | 1.443 | 2.88  | 0.0005 |

Reference groups are, respectively: age 12-13, female sex, all other racial/ethnic groups, PIR  $\leq$ 1.3, answers of "no" for noise exposure/firearm/hearing protection use.

White, non-Hispanic category is modeled as vs. all other groups due to small sample size.

Hearing aid use: not included in models due to small sample size.

NHANES = National Health and Nutrition Examination Survey.

PIR = poverty income ratio

HFHL = high-frequency hearing loss. LFHL = low-frequency hearing loss.

NITS: noise-induced threshold shifts.
